1 **Childhood Trauma and Trajectories of Depressive Symptoms Across Adolescence**

2 Alex S. F. Kwong<sup>1,2,3</sup> Jennifer M. Maddalena<sup>1</sup>, Jazz Croft<sup>4</sup>, Jon Heron<sup>3,4</sup> & George Leckie<sup>2,5</sup>

3

4 <sup>1</sup>School of Geographical Sciences, University of Bristol, United Kingdom

5 <sup>2</sup>Centre for Multilevel Modelling, University of Bristol, United Kingdom

6 <sup>3</sup>MRC Integrative Epidemiology Unit at the University of Bristol, United Kingdom

7 <sup>4</sup>Population Health Sciences, University of Bristol, United Kingdom

8 <sup>5</sup>School of Education, University of Bristol, United Kingdom

9

10 Corresponding Author: Alex S. F. Kwong, School of Geographical Sciences, University of  
11 Bristol, University Road, BS8 1SS, United Kingdom.

12 E: Alex.Kwong@Bristol.ac.uk

13 Word count: 5930 (excluding abstract, references, tables and figures)

14

15 Keywords: depressive symptoms; trajectories; childhood trauma; ALSPAC; multilevel  
16 model; growth-curve model

17

## 18 **Abstract**

### 19 **Background:**

20 Growth curve modelling such as trajectory analysis is useful for examining the longitudinal  
21 nature of depressive symptoms, their antecedents and later consequences. However, issues in  
22 interpretation associated with this methodology could hinder the translation from results to  
23 policy changes and interventions. The aim of this article is to provide a “model interpretation  
24 framework” for highlighting growth curve results in a more interpretable manner. Here we  
25 demonstrate the association between childhood trauma and trajectories of depressive  
26 symptoms. Childhood trauma has been shown to be a strong predictor for later depression,  
27 but less is known how childhood trauma has an effect throughout adolescence and young  
28 adulthood. Identifying when childhood trauma (and its severity) is likely to have its greatest  
29 impact on depression is important for determining the timing of interventions for depression.

### 30 **Methods:**

31 We used data on over 6,500 individuals from the Avon Longitudinal Study of Parents and  
32 Children (ALSPAC) to estimate trajectories of depressive symptoms between the ages of 11  
33 and 24. Depressive symptoms were measured using the short mood and feelings  
34 questionnaire (SMFQ) across 9 occasions. Childhood trauma was assessed between the ages  
35 of 5 and 10 years old, and we estimated population averaged multilevel growth curves of  
36 depressive symptoms for exposure to trauma (yes vs no) and then in a separate model, the  
37 number of trauma types reported such as inter-personal violence or neglect (coded as 0, 1, 2,  
38 3+). We then calculated what the depressive symptoms scores would be ages 12, 14, 16, 18,  
39 20, 22, 24, between these varying trajectories.

### 40 **Results:**

41 Reported exposure to childhood trauma was associated with less favourable trajectories of

42 depressive symptoms across adolescence, mainly characterised by exposed individuals  
43 having worse depressive symptoms at age 16. There was an exposure-response relationship  
44 between the number of childhood traumas and trajectories of depressive symptoms.  
45 Individuals exposed to 3 or more types of trauma had substantially steeper and less  
46 favourable trajectories of depressive symptoms: becoming worse at a more rapid rate until the  
47 age of 18. By age 18, individuals that reported the greatest exposure to trauma (3+ types of  
48 trauma) had 14% more depressive symptoms compared to non-exposed participants.

49 Limitations:

50 This study was subject to attrition, particularly towards the latter ages of the SMFQ.

51 Conclusion:

52 Childhood trauma is strongly associated with less favourable trajectories of depressive  
53 symptoms across adolescence. Individuals exposed to multiple types of inter-personal  
54 violence or neglect are at the greatest risk of worsening depressive symptoms throughout  
55 adolescence and young adulthood. Individuals exposed to traumatic experiences in childhood  
56 should be identified as at high risk of depression and other adverse outcomes as early trauma  
57 may disrupt social development and have lasting consequences on mental health outcomes.  
58 The model interpretation framework presented here may be more interpretable for  
59 researchers, clinicians and policy makers as it allows comparisons of depression across  
60 multiple stages of development to highlight when the effects of depression are greatest.

## 61 1. Introduction

62 Growth curve modelling is useful for examining the longitudinal nature of depression  
63 across development (Musliner, Munk-Olsen, Eaton, & Zandi, 2016; Sutin et al., 2013).  
64 Growth curve models allow researchers to estimate trajectories that describe patterns of  
65 change in depressive mood over time. These are potentially more useful than analysis of data  
66 from any single occasion, as it is possible to estimate the longitudinal nature of depression  
67 across periods of development. Furthermore, it is possible to examine the antecedents of  
68 varying trajectories of depressive symptoms (Ferro, Gorter, & Boyle, 2015a; Ge, Natsuaki, &  
69 Conger, 2006; Mazza, Fleming, Abbott, Haggerty, & Catalano, 2010), their later  
70 consequences (Whalen et al., 2016; Yaroslavsky, Pettit, Lewinsohn, Seeley, & Roberts,  
71 2013), their relationship with other co-occurring traits (Marmorstein, 2009; Mumford, Liu,  
72 Hair, & Yu, 2013; Wiesner & Kim, 2006) and the identification of critical points that could  
73 be translated into preventions and interventions (Kwong et al., 2019). Consequently, growth  
74 curve or trajectory analysis is not only a useful tool for research, but also potentially for  
75 clinical inference and identifying at risk groups for treatment (Schubert, Clark, Van,  
76 Collinson, & Baune, 2017).

77 Methodology exploring trajectories of depressive symptoms has been increasingly  
78 used in recent years (Musliner et al., 2016; Schubert et al., 2017; Shore, Toumbourou, Lewis,  
79 & Kremer, 2018). However, much of this research has yet to impact on policy and clinical  
80 inference, which could be a result of difficulties in translating findings to inference.  
81 Estimating trajectories of depressive symptoms can be done in several ways: one approach is  
82 to plot the mean scores by age and depressive symptoms and compare differences at each age  
83 (i.e., with a t-test/ANOVA). However, one problem with this approach is that there may be  
84 different samples at the various ages, and this can lead to biased estimates with missing data.  
85 A more popular approach is to stratify population trajectories into multiple sub-group

86 trajectories (e.g., latent classes growth analysis or growth mixture models, see (Muthen &  
87 Muthen, 2000)). An alternative approach is to estimate population-averaged trajectories, with  
88 individuals being allowed to vary around this population average (e.g., multilevel growth-  
89 curves and structural equation models, see (Hedeker & Gibbons, 2006)). These latter  
90 approaches quantify the degree of change, making them useful methods for estimating how  
91 depression changes over a certain period of time, and what might predict this change. These  
92 two approaches are somewhat similar but can produce different results and interpretations,  
93 thus harmonising results from both analyses is challenging and could impact on how  
94 clinicians and policy makers interpret and implement these findings.

95         One issue with the longitudinal analyses of depressive mood is that depression  
96 fluctuates and is characterised by periods of rapid growth and varying ages of onset (Ferro,  
97 Gorter, & Boyle, 2015b; Kwong et al., 2019), especially during heightened risk periods such  
98 as adolescence (Thapar, Collinshaw, Pine, & Thapar, 2012). In many studies, modelling  
99 trajectories of depressive symptoms and the subsequent interpretation is complex. For  
100 example, changes in depression are rarely linear. Studies may typically use higher order  
101 polynomials to model non-linear trajectories (e.g., quadratic and cubic functions of age),  
102 which can result in complicated model estimates (positive quadratic terms but negative cubic  
103 terms etc). This can be difficult for researchers and clinicians to interpret and inform policy  
104 and practise. Therefore, it is important to find alternative ways to highlight results from  
105 trajectory methods. An example of this has been demonstrated in longitudinal assessments of  
106 autistic traits (Mandy, Pellicano, St Pourcain, Skuse, & Heron, 2018). Here, Mandy and  
107 colleagues estimated differences in the predicted autistic traits scores between male and  
108 female trajectories at several ages.

109         This approach could be beneficial when applied to the longitudinal study of  
110 depressive symptoms. It is often important to not only highlight the course of depression over

111 time, but also when differences may be occurring and whether two or more trajectories (i.e.,  
112 exposed to trauma vs not exposed to trauma) differ at a certain age or stage of development.  
113 The results in many studies highlighting differences between trajectories are not straight  
114 forward, as the presented estimates are typically the estimated coefficients of polynomials  
115 and the coefficient of each term in the polynomial is hard to interpret in isolation. More  
116 clarity in this area could assist clinicians and policy makers to understand the implications of  
117 results from analyses of trajectories of health outcomes. Therefore, the first aim of this study  
118 is to highlight how the results from these analyses can be made more interpretable to  
119 researchers, clinicians and policy makers by presenting an alternative model interpretation  
120 framework to highlight results that show the depressive symptoms scores of different  
121 trajectories at different ages.

122         One of the most useful applications for growth curve modelling is to examine how  
123 early antecedents or risk factors may predict the trajectory of depressive symptoms over time.  
124 Here, we use the example of exposure to childhood trauma to examine its association with  
125 depressive symptoms across adolescence and young adulthood. Childhood traumas is a key  
126 predictor for adolescent and young adulthood depression (Copeland et al., 2018; Lewis et al.,  
127 2019; Sara & Lappin, 2017), yet its effect on depression throughout the course of adolescence  
128 and young adulthood is still not clear.

129         Latent class analysis has found that exposure to abuse before the age of 18 years old is  
130 associated with less favourable trajectories of depressive symptoms (Olino, Klein,  
131 Lewinsohn, Rohde, & Seeley, 2010). Here, Olino and colleagues found that individuals who  
132 scored higher on a scale of childhood adversity and abuse has increased odds of belonging to  
133 the ‘persistent’, ‘increasing’ and ‘initially high’ trajectories, but interestingly not the ‘later  
134 onset’ trajectory of depressive symptoms. Maltreatment in childhood has also been associated  
135 with steeper trajectories of depressive symptoms, and those who experienced sexual abuse

136 younger were more likely to have trajectories that started off higher, but then reduced over  
137 time (Carlson & Oshri, 2018; Keane, Magee, & Kelly, 2018). These results suggest that the  
138 effects of childhood trauma may have more damaging effects during the formative years of  
139 adolescence, as opposed to an increased risk of depression at a later age. There is also  
140 evidence to suggest that more stressful life events in childhood are associated with higher  
141 trajectories of depressive symptoms in other longitudinal studies (Fernandez Castela &  
142 Kroner-Herwig, 2013; Lee, Wickrama, Kwon, Lorenz, & Oshri, 2017; Stoolmiller, Kim, &  
143 Capaldi, 2005; Weeks et al., 2014). However, in many of these studies, depressive symptoms  
144 are not measured across the entire period of adolescence and therefore the true longitudinal  
145 nature of childhood trauma on trajectories of depressive symptoms is not known.

146 For population averaged trajectories, there is less evidence that negative life events in  
147 childhood may impact on trajectories of depressive symptoms. However, recent studies have  
148 found that adverse childhood experiences including abuse and neglect were associated with  
149 less favourable trajectories of depressive symptoms (Barboza & Dominguez, 2017) and that  
150 increased stressful life events were associated with a steeper slope for trajectories of  
151 depressive symptoms across adolescence (Adkins, Wang, Dupre, van den Oord, & Elder,  
152 2009; Ge, Lorenz, Conger, Elder, & Simons, 1994).

153 Identifying when childhood trauma is likely to have its greatest impact on depression  
154 throughout adolescence and young adulthood is important for indicating when interventions  
155 and support may be most beneficial. Currently, there is a paucity of knowledge on when  
156 childhood trauma is likely to have the greatest impact on trajectories of depressive symptoms.  
157 There is also some evidence to suggest that negative life events such as trauma and stressful  
158 life events are not associated with worsening trajectories (Mazza et al., 2010; Sallinen,  
159 Rönkä, Kinnunen, & Kokko, 2016). However, we note that in one of these studies, negative

160 life events were assessed by parental report (Mazza et al., 2010), which could lead to an  
161 underreporting of the exposure.

162         Research has also yet to focus on how the number of traumatic experiences may  
163 predict the longitudinal nature of depression. There is some evidence to suggest that the  
164 number of stressful life events may explain the extent to which the risk of depression is  
165 increased by exposure to trauma. More than two stressful life events early in childhood have  
166 been associated with higher trajectories of depressive symptoms (Weeks et al., 2014).  
167 However, little is known about traumatic experiences in childhood and later trajectories of  
168 depression. Life-course models suggest that an accumulation of negative events may be more  
169 harmful than traumatic exposure on a single occasion (Dunn, Soare, et al., 2018). It is  
170 therefore important to examine if the number of childhood traumatic experiences might  
171 differentially predict varying trajectories of depressive symptoms across adolescence.

172         Thus, the second aim of the current study is to build upon previous research by  
173 examining the association between childhood trauma and trajectories of depressive symptoms  
174 across adolescence and young adulthood. We are also interested in extending previous  
175 research by investigating how this association might change depending on the number of  
176 childhood traumatic experiences.

177



## 178 **2. Method**

### 179 *2.1. Study sample*

180 We used data from the Avon Longitudinal Study of Parents and Children (ALSPAC),  
181 a birth cohort that recruited pregnant women residing in Avon, UK with expected dates of  
182 delivery 1<sup>st</sup> April 1991 to 31<sup>st</sup> December 1992 (Boyd et al., 2013; Fraser et al., 2013). The  
183 initial cohort consisted of 14,062 children and all participants provided written informed  
184 consent. Ethical approval was obtained from the ALSPAC Ethics and Law Committee and  
185 the Local Research Ethics Committees. The study website contains details of all the data that  
186 is available through a fully searchable data dictionary and variable search tool:

187 <http://www.bristol.ac.uk/alspac/researchers/our-data>. Part of this data was collected using  
188 REDCap, please see the REDCap website for details  
189 (<https://projectredcap.org/resources/citations/>).

### 190 *2.2. Measures*

#### 191 *2.2.1. Depressive symptoms*

192 Self-reported depressive symptoms were measured on nine occasions between ages 10  
193 and 24 using the short mood and feelings questionnaire (SMFQ) (Angold, Costello, Messer,  
194 & Pickles, 1995). The SMFQ is a 13-item questionnaire that measures the presence of  
195 depressive symptoms in the last two weeks and was administered via postal questionnaire or  
196 in clinics. Each item is scored 0,1 or 2, resulting in a summed score between 0-26. The  
197 SMFQ correlates strongly with clinical depression (Thapar & McGuffin, 1998; Turner,  
198 Joinson, Peters, Wiles, & Lewis, 2014) and has been used to explore trajectories of  
199 depressive symptoms in other studies (Kwong et al., 2019; Mahedy et al., 2017; Rice et al.,  
200 2018).

201

202

### 203 2.2.2. *Trauma*

204 Two measures of trauma were used for this analysis derived from previous analysis  
205 (Croft et al., 2018; Houtepen, Heron, Suderman, Tilling, & Howe, 2018): (1) A binary  
206 measure of inter-personal violence and neglect during mid-childhood (age 5-10.9 years;  
207 [no=0; yes=1]) and (2) the number of trauma types reported during mid-childhood (0, 1, 2 or  
208 3 or more [3+]). Briefly, these variables were derived from 121 self-report and parent report  
209 questions about traumatic experiences. The data used to create these variables were taken  
210 from multiple trauma questions collected from both parents and children regarding exposure  
211 to sexual abuse, physical abuse, emotional abuse, emotional neglect, domestic violence and  
212 bullying.

### 213 2.2.3. *Confounders*

214 The following confounders were included based upon previous literature examining  
215 early social risk factors and trajectories of depressive symptoms (Kingsbury et al., 2016;  
216 Kwong et al., 2019; Mahedy et al., 2017): sex (coded as a dummy variable for being female  
217 [male = 0; female =1]), maternal postnatal depression (no vs yes), maternal socioeconomic  
218 status at birth (manual vs non-manual), maternal educational attainment at birth (A-level or  
219 higher vs O-level vs < O-level) and parity (1<sup>st</sup> born vs 2<sup>nd</sup> born vs 3<sup>rd</sup> born or more).

220

**Insert Table 1 Here**

### 221 2.3. *Statistical methods*

222 Trajectories of depressive symptoms were estimated using multilevel growth-curve  
223 modelling (Hedeker & Gibbons, 2006; Raudenbush & Bryk, 2002). Briefly, multilevel  
224 growth-curve models estimate population averaged trajectories, with individual level

225 trajectories varying around these population averages (i.e., each person can have their own  
226 trajectory that deviates from the average for their population). Descriptive statistics and  
227 previous analysis on this data has shown that change in depressive symptoms over time is  
228 non-linear (Kwong et al., 2019). To model this non-linearity, a multilevel quartic age  
229 polynomial growth-curve model was chosen in line with previous research using higher-order  
230 age polynomials for examining trajectories of depressive symptoms (Ferro et al., 2015a;  
231 Kwong et al., 2019; Rawana & Morgan, 2014). Age was first grand-mean centred around  
232 16.53 years (the mean age of all assessments) in order to improve interpretation (Ferro et al.,  
233 2015a; Kwong et al., 2019; Rawana & Morgan, 2014), since model intercept and intercept  
234 variance then correspond to the middle of adolescence. Model fit was assessed using  
235 likelihood-ratio tests and information criteria, consistent with other studies using multilevel  
236 growth-curve models (Singer & Willett, 2003).

237         We ran separate models to examine the association between each trauma variable and  
238 these trajectories of depressive symptoms. The first model examined population-averaged  
239 trajectories for the exposure to trauma (no vs yes) by interacting the fixed-effects quartic age  
240 polynomial terms with the “any trauma” dummy variable. This produced two trajectories of  
241 depressive symptoms corresponding to the sub-populations with and without trauma. The  
242 second model repeated this approach by entering dummy variables representing the number  
243 of traumatic experiences (1, 2 and 3+). In all the analyses, the quartic polynomial age terms  
244 varied randomly across individuals to capture each individual’s unique trajectory.

245         We then predicted depressive symptoms scores at each of the following ages: 12, 14,  
246 16 18, 20, 22 and 24, separately for each population averaged trajectory. We used the delta  
247 method to compare these predicted scores across the different trajectories at each of these  
248 ages.

249 All analyses were conducted using Stata 15 (StataCorp, College Station, TX, USA)  
250 using the user-written runmlwin command (Leckie & Charlton, 2013), which calls the  
251 standalone multilevel modelling package MLwiN v3.01  
252 ([www.cmm.bristol.ac.uk/MLwiN/index.shtml](http://www.cmm.bristol.ac.uk/MLwiN/index.shtml)). We note that MLwiN can also be called  
253 within R using the R2MLwiN package (Zhang, Parker, Charlton, Leckie, & Browne, 2016).  
254 For the analysis using the delta method, non-linear comparisons were estimated using the  
255 ‘nlcom’ command in Stata. Model equations and additional information are provided in the  
256 supplementary materials for further interpretation. To facilitate replication, annotated Stata  
257 code can be found here: <https://github.com/kwongsiufung>.

### 258 *2.3.1 Missing data*

259 Missing data in the repeated measures data were handled using full information  
260 maximum likelihood (FIML), which assumes that data are missing at random (Little &  
261 Rubin, 2019). This means that once we account for the series of depressive symptoms scores  
262 and any covariate information that we do observe on a subject, the probability that they are  
263 missing in the data at any occasion does not depend on their unknown level of depressive  
264 symptoms at that occasion. Previous analysis has found that FIML is an appropriate method  
265 for handling missing data when examining trajectories of depressive symptoms (Kwong et  
266 al., 2019). Likewise, previous research has shown that there is no substantive change in the  
267 model estimates when removing individuals with more extreme missing data patterns  
268 (Kwong et al., 2019; Lopéz-Lopez et al., Forthcoming). We therefore include individuals in  
269 our analysis with at least one measurement of depressive symptoms in order to increase  
270 power to detect an association between the various trauma types and depressive symptoms.

## 271 **3. Results**

### 272 *3.1. Sample characteristics*

273 Participant demographics are described in Table 1. Additional descriptive statistics  
274 and reliability measures for the SMFQ are described in Supplementary Table 1. There were  
275 6,711 individuals with data on the number of traumas, at least one measurement of depressive  
276 symptoms and all confounders. The interpretation of the results did not vary substantially  
277 with the inclusion of confounders, thus only the adjusted analysis are reported here.

278 Unadjusted analyses are reported in Supplementary Tables 2 and 3.

### 279 *3.2. Direct model output vs alternative model parameterisation*

280 Estimates from each trauma model can be parameterised in two ways. As the trauma  
281 variables were coded as dummy variables for both any trauma variable (coded as 0/1) and  
282 number of traumas (coded as 0/1/2/3+), the 0 coded dummy variable can be thought of as the  
283 baseline trajectory. Therefore, the effect of trauma (being coded as 1) or the number of  
284 traumas (coded as 1/2/3+) are ‘added’ onto the baseline trajectory to represent the effect of  
285 having any trauma/number of traumas. As shown in Tables 2 and 3, the direct model output  
286 shows the intercept and age term coefficients in the dummy variable regression format.  
287 However, it is also possible to calculate an alternative parameterisation of the model in a  
288 more interpretable manner by showing the complete trajectory estimates for an individual  
289 with no trauma compared to an individual with trauma or the number of traumas. This is  
290 achieved by adding the coefficient of the trauma variable onto the coefficient of the reference  
291 variable which then calculates the intercept or age terms for each distinct population  
292 trajectory.

### 293 *3.3. Association between any trauma and trajectories of depressive symptoms*

294 As shown in Figure 1, individuals exposed to trauma (between ages 5-10) had worse  
295 trajectories of depressive symptoms compared to those who had not experienced trauma.  
296 Both trajectories increased throughout adolescence until the age of 18, where symptoms  
297 decreased. However, symptoms then began to rise again from the age of 22. The main  
298 differences between the two trajectories were characterised by individuals exposed to trauma  
299 having a higher intercept<sup>1</sup> at age 16 ( $\beta = 6.4$ , SE= 0.13 [95% CI: 6.15, 6.65]) compared to  
300 non-trauma exposed individuals ( $\beta = 5.17$ , SE= 0.11 [95% CI: 4.96, 5.38];  $p^{\text{diff}} < .001$ ).  
301 There was a weak association between individuals exposed to trauma and the linear age term  
302 ( $\beta = 0.38$ , SE= 0.03 [95% CI: 0.33, 0.43]), compared to non-trauma exposed individuals ( $\beta =$   
303  $0.32$ , SE= 0.02 [95% CI: 0.28, 0.36];  $p^{\text{diff}} = .09$ ), which suggested that individuals with  
304 trauma may have higher linear growth. However, there was no association between the  
305 remaining age terms (e.g., quadratic, cubic and quartic age terms) and the non-trauma and  
306 trauma exposed individuals ( $p^{\text{diff}} = .11$ ), implying that overall growth was not substantially  
307 different between the two trajectories. Full estimates are shown in Table 2.

308 **Insert Table 2 and Figure 1 Here**

309 *3.4. Association between the number of types of trauma and trajectories of depressive*  
310 *symptoms*

311 As shown in Figure 2, there was an exposure-response relationship between the  
312 number of types of traumas (between ages 5-10) and later trajectories of depressive  
313 symptoms, with a tendency for more traumatic experiences in childhood to be associated with  
314 steeper trajectories of depressive symptoms. All four trajectories increased throughout  
315 adolescence and began to decrease from about the age of 18 and all trajectories again began  
316 to rise from the age of about 22. These differences between trajectories were mainly

---

<sup>1</sup> Intercepts were centered to 16.53 years, the grand mean age. Centering the intercepts is common practice and allows for easier interpretation (Kwong et al., 2019).

317 characterised by individuals who experienced no trauma having a lower intercept score at age  
318 16 ( $\beta = 5.18$ , SE= 0.11 [95% CI: 4.97, 5.39]) compared to individuals with one trauma ( $\beta =$   
319 5.9, SE= 0.15 [95% CI: 5.61, 6.18];  $p^{\text{diff}} < .001$ ), two traumas ( $\beta = 6.87$ , SE= 0.23 [95% CI:  
320 6.43, 7.32];  $p^{\text{diff}} < .001$ ) and three or more types of traumas ( $\beta = 8.81$ , SE= 0.35 [95% CI:  
321 8.12, 9.49];  $p^{\text{diff}} < .001$ ). There was a weak association between individuals exposed to two  
322 traumas and the linear age term ( $\beta = 0.43$ , SE= 0.06 [95% CI: 0.33, 0.54]), compared to non-  
323 trauma exposed individuals ( $\beta = 0.32$ , SE= 0.02 [95% CI: 0.28, 0.36];  $p^{\text{diff}} = .05$ ), which  
324 suggested that individuals exposed to two traumatic experiences may have higher linear  
325 growth. There were no associations between the remaining age terms and the non-trauma,  
326 one trauma and two traumas exposed individuals ( $p^{\text{diff}} = .13$ ), suggesting that overall growth  
327 of the trajectories did not differ substantially between no trauma and the one/two traumas  
328 trajectories. There were also associations between individuals exposed to three or more types  
329 of traumatic experiences and the linear ( $\beta = 0.51$ , SE= 0.09 [95% CI: 0.34, 0.67]), quadratic  
330 ( $\beta = -0.2$ , SE= 0.03 [95% CI: -0.26, -0.15]), cubic ( $\beta = -0.009$ , SE= 0.002 [95% CI: -0.01, -  
331 0.005]) and quartic age terms ( $\beta = 0.004$ , SE= 0.001 [95% CI: 0.003, 0.005]), compared to  
332 the linear ( $\beta = 0.32$ , SE= 0.02 [95% CI: 0.32, 0.36];  $p^{\text{diff}} = .03$ ), quadratic ( $\beta = -0.1$ , SE= 0.01  
333 [95% CI: -0.11, -0.08];  $p^{\text{diff}} < .001$ ), cubic ( $\beta = -0.004$ , SE= 0.001 [95% CI: -0.01, -0.003];  
334  $p^{\text{diff}} = .05$ ) and quartic age terms ( $\beta = 0.002$ , SE= 0.0001 [95% CI: 0.001, 0.002];  $p^{\text{diff}} =$   
335  $< .001$ ) for those individuals who were not exposed to any trauma respectively. This  
336 suggested that individuals exposed to three or more types of traumas had less favourable  
337 trajectories that had a higher rate of change compared to the non-trauma exposed group. Full  
338 estimates are shown in Table 3.

339 **Insert Table 3 and Figure 2 Here**

340 *3.5. Comparing depressive symptom scores at different ages*

341 To aid the interpretation of our analysis we compared predicted depressive symptoms  
342 scores at various ages throughout adolescence and young adulthood. We then examined  
343 whether these symptoms scores differed by the varying trajectories. To correct for multiple  
344 hypothesis testing, we used a Bonferroni adjustment of  $0.001^2$  to estimate corrected main  
345 effects between these differences. As shown in Table 4, the predicted depressive symptoms  
346 scores at all ages were higher for individuals exposed to any trauma, compared to those who  
347 experienced no trauma ( $p^{\text{diff}} = <.001$ ). The largest difference between these two trajectories  
348 occurred at age 20 ( $\beta = 1.37$ ,  $SE = 0.16$ ,  $p^{\text{diff}} = <.001$ ), which corresponded to a 5.27%<sup>3</sup>  
349 difference in depressive symptoms.

350 Results were comparable for the analysis on the number of traumas with individuals  
351 with more types of traumas having greater depressive symptoms score differences compared  
352 to those who had experienced no trauma. However, there was no difference in predicted  
353 depressive symptoms at age 24 between the no trauma trajectory and those with 1 trauma ( $\beta =$   
354  $0.7$ ,  $SE = 0.23$ ,  $p^{\text{diff}} = .003$  [Bonferroni adjusted]). Likewise, there were no differences  
355 between symptom scores for individuals in the one trauma trajectory, and those in the two  
356 traumas trajectory at ages 12, 14 and 22 ( $p^{\text{diff}} > .0.002$  [Bonferroni adjusted]), and the one  
357 trauma trajectory and the three or more trauma trajectory at ages 12 and 22 ( $p^{\text{diff}} > .0.002$   
358 [Bonferroni adjusted]). There were no differences in symptoms scores between the two  
359 traumas trajectory and the three or more trauma trajectory at ages 12, 20, 22 and 24 ( $p^{\text{diff}} >$   
360  $.0.016$  [Bonferroni adjusted]). The largest difference between the trajectories occurred  
361 between the no trauma trajectory and three or more traumas trajectory at age 18 ( $\beta = 3.67$ ,  
362  $SE = 0.38$ ,  $p^{\text{diff}} = <.001$ ), which corresponded to a 14% difference in depressive symptoms.

---

<sup>2</sup> The Bonferroni adjustment was calculated by assuming an alpha level of 0.05. We ran 49 statistical comparisons. Thus, the adjusted Bonferroni corrected level was calculated by  $0.05/49 = 0.001$ . Thus we only declared comparisons with p-values less than 0.001 as significant at the 5% level.

<sup>3</sup> The % difference in depressive symptoms was calculated by taking the predicted difference score (e.g., 1.37) and dividing it by the total maximum depressive symptoms score of 26 ( $1.37/26=5.27$ ).



**Insert Table 4 Here**

## 364 **4. Discussion**

### 365 *4.1. Main findings*

366 We examined the association between childhood trauma and trajectories of depressive  
367 symptoms between the ages of 11 and 24 years. We also examined how the number of types  
368 of trauma exposure reported during mid-childhood may be associated with higher trajectories  
369 of depressive symptoms. One of our main goals was to convey these results in a more  
370 interpretable manner that might be beneficial for researchers, clinicians and policy makers.  
371 Previous research tends to just display the coefficients from a model, thus making it difficult  
372 to interpret results that are non-linear over time. We have provided a framework which easily  
373 transforms direct model output into more interpretable coefficients that can be compared  
374 across multiple stages of development. Figure 1 demonstrates the utility of this approach.  
375 The use of this framework quantifies how different population averaged trajectories vary  
376 between each other at varying times (i.e., how no trauma individuals differ from exposed to  
377 trauma individuals at age 12 or age 18 etc). We hope that future research will utilise this  
378 approach for other trajectory comparisons in the hope of developing and improving  
379 treatments and interventions.

380 Exposure to childhood trauma was strongly associated with a steeper trajectory of  
381 depressive symptoms. As well as having higher predicted depressive symptoms scores at age  
382 16, predicted symptoms scores were also higher between the ages of 12 and 24. However, the  
383 growth or rate of change did not change substantively depending on exposure to trauma.  
384 Importantly, our analysis on the number of trajectories revealed an exposure-relationship  
385 response which demonstrated that a greater number of the types of traumatic experiences in  
386 childhood was associated with less favourable trajectories. Whilst the overall rate of change  
387 did not differ substantially between those not exposed to trauma and those who reported

388 either one or two types of trauma exposure, individuals exposed to three or more trauma  
389 types (i.e., those who are polyvictimised) had a substantively higher rate of change compared  
390 to non-exposed individuals. Specifically, polyvictimised individuals had an increased rate of  
391 depressive symptoms throughout adolescence, which implies that depression was getting  
392 worse more rapidly compared to individuals who did not report exposure to trauma.  
393 Importantly, we also observed that depressive symptoms scores were higher at almost every  
394 two-year interval for the non-exposed individuals compared to those with exposure to one,  
395 two or three or more types of trauma. The greatest difference occurred between the no trauma  
396 trajectory and the three or more traumas trajectory at age 18 (corresponding to nearly a 4  
397 point or 14% difference in depressive symptoms).

398         These findings support previous research examining the effects of trauma and  
399 negative life experiences on later trajectories of depressive symptoms (Barboza &  
400 Dominguez, 2017; Carlson & Oshri, 2018; Keane et al., 2018; Olinio et al., 2010), and the  
401 number of stressful events on higher trajectories (Weeks et al., 2014). These findings are  
402 consistent with additional research that suggests that childhood trauma does impact on later  
403 depression (Copeland et al., 2018; Lewis et al., 2019) and efforts should be made to prevent  
404 traumatic experiences occurring in childhood and support those individuals who are exposed  
405 to trauma (Sara & Lappin, 2017). Our research highlights that those most at risk (i.e.,  
406 polyvictimised in childhood) have substantially less favourable trajectories of depressive  
407 symptoms and efforts should be made to support this at-risk group, potentially through  
408 community and individual-level interventions to mitigate or prevent the risk of adverse  
409 mental health outcomes post-trauma and throughout adolescence.

410         There are several mechanisms, both psychological and biological, that have been  
411 considered to contribute to the pathway from exposure to traumatic experiences to the  
412 development of depression. Our findings of the association between exposure to trauma and

413 the trajectory of depressive symptoms may inform theoretical frameworks of these  
414 mechanisms. Trauma in early life may have lasting effects on the risk of depression due to its  
415 impact during development, and as such reduces the ability to build resilience in adolescence  
416 which results in an increased risk of greater depressive symptoms later in life (Copeland et  
417 al., 2018; Dunn, Gilman, Willett, Slopen, & Molnar, 2012; Dunn, Nishimi, Gomez, Powers,  
418 & Bradley, 2018). Chronic exposure to childhood trauma is associated with repeated  
419 victimisation and psychological distress in adolescence (Dierkhising, Ford, Branson, Grasso,  
420 & Lee, 2019), and a range of negative functional outcomes in adulthood (Copeland et al.,  
421 2018). Previous research has also found that extreme stress during childhood and adolescence  
422 may have stronger or longer lasting effects on the HPA axis compared to trauma exposure in  
423 adulthood (Lupien, McEwen, Gunnar, & Heim, 2009), and is considered a key mediator in  
424 the relationship between trauma and negative mental health outcomes (Heim, Newport,  
425 Mletzko, Miller, & Nemeroff, 2008; Owens et al., 2018). Our findings for increased risk of  
426 depressive symptoms from exposure to trauma over the course of adolescence is consistent  
427 with evidence of sustained dopamine dysregulation from trauma exposure during early life.

#### 428 *4.2. Considerations*

429 We have transformed the direct model output into two potentially more helpful  
430 frameworks which better highlight results and we consider this one of the key contributions  
431 of this work. The first is to transform the original model coefficients into a calculated set of  
432 alternative estimates: the “*Alternative Parametrisation*”. This simply adds the baseline  
433 intercept and age terms onto the additional groups giving a clearer idea of what depressive  
434 symptoms scores are at the intercept age and how they change over a one-year period.  
435 However, as the trajectories are non-linear and have multiple age terms, even this can be  
436 challenging to interpret, so the second approach is to create predicted depressive symptoms  
437 scores at various ages for different population averaged trajectories and to compare them with

438 degrees of uncertainty. This takes into account the non-linearity of the age terms and  
439 represents an easy way to interpret the coefficients from the model. Both these methods  
440 improve interpretation from the direct model output and are important to highlight as it is  
441 important to know the coefficients for change over time, not just what the scores are at the  
442 intercept. Such analysis could be useful for individuals without statistical backgrounds, and it  
443 is much easier to interpret a predicted mean difference in symptoms at a particular age, rather  
444 than interpreting complex non-linear and contrasting coefficients (e.g., interpreting a positive  
445 linear age term but negative quadratic and positive cubic terms). Interpreting these  
446 coefficients in isolation is often not practical, but the framework presented in Table 4 and  
447 Figure 1 could aid in the interpretation of complex results into clinical practise and treatment.

448         However, there are certain considerations that must be made. Firstly, in this analysis,  
449 we chose to use multilevel growth-curve models. Alternative analysis could have used a  
450 growth mixture modelling or latent class approach to derive multiple sub-population  
451 trajectories and then compared depressive symptom scores at various ages between differing  
452 sub-population trajectories (i.e., differences in depression at age 12 between a stable low,  
453 increasing and decreasing trajectory). We chose to use a population-averaged approach with  
454 quartic polynomials in order to quantify the population averaged rate of change of depressive  
455 symptoms associated with exposure to varying degrees of trauma. However, higher order  
456 polynomials may constrict the data to take a quartic shape, thus giving estimates that are  
457 extrapolated beyond the data. This problem would also be present in the growth mixture and  
458 latent class approach. It could be possible to use other functions of time in place of higher  
459 order polynomials such as splines and fractional polynomials (Tilling, Macdonald-Wallis,  
460 Lawlor, Hughes, & Howe, 2014). However, extrapolation beyond the data is still an issue  
461 with these models. Thus, a safer option to account for extrapolation would be to refrain from

462 computing estimates close to the tails of the trajectory. This would avoid calculating  
463 nonsensical estimates that are beyond the range of the date.

464 A second consideration regards the number of tests that could be run in the framework  
465 presented here. As shown in Table 4, we ran multiple comparisons between the no trauma  
466 and yes trauma trajectories, and with the no trauma and number of trauma trajectories,  
467 resulting in 49 statistical comparisons. Whilst it is important to compare these multiple ages,  
468 one concern is that by running multiple sets of analysis, the chances of obtaining a type one  
469 error increase (i.e., reporting a sample mean difference to be significant when there is not  
470 mean difference in the population: a chance result). Alternatively, such methods may also  
471 facilitate research that searches for “statistically significant” differences. This is not the point  
472 of such analysis and we advocate the use of Bonferroni adjusted comparisons, or false  
473 discovery rates (FDR) to minimise the impact of both scenarios.

#### 474 *4.3. Limitations and future research*

475 Attrition plays a part in any longitudinal study. Missing data could be biasing our  
476 results. Previous analysis using similar methods has shown that when using multiple methods  
477 for dealing with missing data, the estimates do not change substantively (Lopez-Lopez et al.,  
478 forthcoming; Kwong et al., 2019). To account for this missing data, we used full information  
479 maximum likelihood (FIML) which makes a missing at random (MAR) assumption.  
480 However, even though we used this approach to account for missing data, we cannot fully  
481 rule out the effect of missing data on our results. One alternative approach would be to use  
482 multiple imputation where auxiliary variables can be introduced into the imputation model to  
483 make the MAR assumption more credible

484 Additionally, we only examined childhood trauma between the ages of 5 and 10 years  
485 old. There may be varying effects for traumas at earlier or later ages that could be

486 investigated further. However, this was beyond the scope of this study and would likely  
487 require advanced modelling techniques, in order to approximately capture the time-varying  
488 element of childhood trauma. For instance, childhood trauma may cause depression, but there  
489 may also be reverse-causal effects from depressive symptoms on the risk of childhood  
490 trauma. Future models should take such modelling into account when examining the  
491 longitudinal relationship between childhood trauma and depression. Future research should  
492 also consider the timing and accumulation of exposures as these are important for later  
493 depression (Dunn, Soare, et al., 2018; Smith et al., 2016). For example, those who have  
494 exposure to multiple instances of trauma over consecutive periods of development may be at  
495 the greatest risk, but research has yet to explore this.

496         Also, many of the childhood trauma items were parent-reported, which may be  
497 subject to report bias. However, sensitivity analyses using this data has found little difference  
498 in parent-child reports for trauma (Croft et al., 2018). The measure of exposure frequency  
499 used in the study is based on the number of different types of trauma reported, which is only  
500 an approximate measure of how chronic trauma exposure is during the age period. There may  
501 be variation in the frequency of a single type of trauma exposure and its severity that this  
502 analysis is unable to account for. This study also assumes that there is an equal effect of each  
503 trauma type on the risk of depression, which may not be the case. These analyses were not  
504 the primary focus of this study, however, future research should look to explore the impact of  
505 different types of trauma and their associations with later depression as this may help identify  
506 at risk individuals, who could be targeted for interventions and treatment.

507         Previous research has also shown that sex differences in child trauma and depression  
508 may exist, and evidence suggests that stressful life events increase female trajectories of  
509 depressive symptoms, but not males (Adkins et al., 2009; Meadows, Brown, & Elder, 2006).  
510 However, the opposite effect has also been observed in another study (Fernandez Castela &

511 Kroner-Herwig, 2013). Sex differences were beyond the scope of this study as we were  
512 initially interested in presenting a model interpretation framework for trajectories analysis  
513 with a binary and then categorical variable. However, this methodology could be extended to  
514 run a three-way interaction between sex, exposure to trauma and varying trajectories of  
515 depressive symptoms.

516 In conclusion, exposure to childhood trauma was associated with less favourable  
517 trajectories of depressive symptoms. Further to this, there was an exposure-response  
518 relationship with the number of reported types of trauma, with individuals exposed to 3 or  
519 more childhood traumas having substantially higher trajectories of depressive symptoms.  
520 These results suggest that polyvictimised children should be considered at higher risk of  
521 depression during adolescence, which could inform intervention approaches. We have also  
522 provided an alternative model interpretation framework for examining and comparing  
523 trajectories of depressive symptoms, which shows depressive symptoms scores at different  
524 ages for different trajectories. This framework could be more interpretable for researchers,  
525 clinicians and policy workers, which could eventually aid in the translation of such findings  
526 into preventative interventions and treatments.



## 527 References

- 528 Adkins, D. E., Wang, V., Dupre, M. E., van den Oord, E. J. C. J., & Elder, G. H. (2009). Structure and  
529 Stress: Trajectories of Depressive Symptoms across Adolescence and Young Adulthood.  
530 *Social Forces*, *88*(1), 31-60.
- 531 Angold, A., Costello, E. J., Messer, S. C., & Pickles, A. (1995). Development of a short questionnaire  
532 for use in epidemiological studies of depression in children and adolescents. *International*  
533 *Journal of Methods in Psychiatric Research*, *5*(4), 237-249.
- 534 Barboza, G. E., & Dominguez, S. (2017). Longitudinal growth of post-traumatic stress and depressive  
535 symptoms following a child maltreatment allegation: An examination of violence exposure,  
536 family risk and placement type. *Children and Youth Services Review*, *81*, 368-378.  
537 doi:10.1016/j.childyouth.2017.08.029
- 538 Boyd, A., Golding, J., Macleod, J., Lawlor, D. A., Fraser, A., Henderson, J., . . . Davey Smith, G. (2013).  
539 Cohort Profile: the 'children of the 90s'--the index offspring of the Avon Longitudinal Study  
540 of Parents and Children. *Int J Epidemiol*, *42*(1), 111-127. doi:10.1093/ije/dys064
- 541 Carlson, M. W., & Oshri, A. (2018). Depressive Symptom Trajectories Among Sexually Abused Youth:  
542 Examining the Effects of Parental Perpetration and Age of Abuse Onset. *Child Maltreat*,  
543 *23*(4), 387-398. doi:10.1177/1077559518779755
- 544 Copeland, W. E., Shanahan, L., Hinesley, J., Chan, R. F., Aberg, K. A., Fairbank, J. A., . . . Costello, E. J.  
545 (2018). Association of Childhood Trauma Exposure With Adult Psychiatric Disorders and  
546 Functional Outcomes. *JAMA Netw Open*, *1*(7), e184493.  
547 doi:10.1001/jamanetworkopen.2018.4493
- 548 Croft, J., Heron, J., Teufel, C., Cannon, M., Wolke, D., Thompson, A., . . . Zammit, S. (2018).  
549 Association of Trauma Type, Age of Exposure, and Frequency in Childhood and Adolescence  
550 With Psychotic Experiences in Early Adulthood. *JAMA Psychiatry*.  
551 doi:10.1001/jamapsychiatry.2018.3155
- 552 Dierkhising, C. B., Ford, J. D., Branson, C., Grasso, D. J., & Lee, R. (2019). Developmental timing of  
553 polyvictimization: Continuity, change, and association with adverse outcomes in  
554 adolescence. *Child Abuse Negl*, *87*, 40-50. doi:10.1016/j.chiabu.2018.07.022
- 555 Dunn, E. C., Gilman, S. E., Willett, J. B., Slopen, N. B., & Molnar, B. E. (2012). The impact of exposure  
556 to interpersonal violence on gender differences in adolescent-onset major depression:  
557 results from the National Comorbidity Survey Replication (NCS-R). *Depress Anxiety*, *29*(5),  
558 392-399. doi:10.1002/da.21916
- 559 Dunn, E. C., Nishimi, K., Gomez, S. H., Powers, A., & Bradley, B. (2018). Developmental timing of  
560 trauma exposure and emotion dysregulation in adulthood: Are there sensitive periods when  
561 trauma is most harmful? *J Affect Disord*, *227*, 869-877. doi:10.1016/j.jad.2017.10.045
- 562 Dunn, E. C., Soare, T. W., Raffeld, M. R., Busso, D. S., Crawford, K. M., Davis, K. A., . . . Susser, E. S.  
563 (2018). What life course theoretical models best explain the relationship between exposure  
564 to childhood adversity and psychopathology symptoms: recency, accumulation, or sensitive  
565 periods? *Psychol Med*, *48*(15), 2562-2572. doi:10.1017/S0033291718000181
- 566 Fernandez Castela, C., & Kroner-Herwig, B. (2013). Different trajectories of depressive symptoms in  
567 children and adolescents: predictors and differences in girls and boys. *J Youth Adolesc*, *42*(8),  
568 1169-1182. doi:10.1007/s10964-012-9858-4
- 569 Ferro, M. A., Gorter, J. W., & Boyle, M. H. (2015a). Trajectories of depressive symptoms during the  
570 transition to young adulthood: the role of chronic illness. *J Affect Disord*, *174*, 594-601.  
571 doi:10.1016/j.jad.2014.12.014
- 572 Ferro, M. A., Gorter, J. W., & Boyle, M. H. (2015b). Trajectories of Depressive Symptoms in Canadian  
573 Emerging Adults. *American Journal of Public Health*, *105*(11).
- 574 Fraser, A., Macdonald-Wallis, C., Tilling, K., Boyd, A., Golding, J., Davey Smith, G., . . . Lawlor, D. A.  
575 (2013). Cohort Profile: the Avon Longitudinal Study of Parents and Children: ALSPAC mothers  
576 cohort. *Int J Epidemiol*, *42*(1), 97-110. doi:10.1093/ije/dys066

- 577 Ge, X., Lorenz, F. O., Conger, R. D., Elder, G. H., & Simons, R. L. (1994). Trajectories of Stressful Life  
578 Events and Depressive Symptoms During Adolescence. *Developmental Psychology, 30*(4),  
579 467-483.
- 580 Ge, X., Natsuaki, M. N., & Conger, R. D. (2006). Trajectories of depressive symptoms and stressful life  
581 events among male and female adolescents in divorced and nondivorced families. *Dev*  
582 *Psychopathol, 18*(1), 253-273. doi:10.1017/S0954579406060147
- 583 Hedeker, D., & Gibbons, R. D. (2006). *Longitudinal Data Analysis*. Hoboken, New Jersey: John Wiley  
584 & Sons, Inc.
- 585 Heim, C., Newport, D. J., Mletzko, T., Miller, A. H., & Nemeroff, C. B. (2008). The link between  
586 childhood trauma and depression: insights from HPA axis studies in humans.  
587 *Psychoneuroendocrinology, 33*(6), 693-710. doi:10.1016/j.psyneuen.2008.03.008
- 588 Houtepen, L. C., Heron, J., Suderman, M. J., Tilling, K., & Howe, L. D. (2018). Adverse childhood  
589 experiences in the children of the Avon Longitudinal Study of Parents and Children (ALSPAC).  
590 *Wellcome Open Res, 3*, 106. doi:10.12688/wellcomeopenres.14716.1
- 591 Keane, C. A., Magee, C. A., & Kelly, P. J. (2018). Trajectories of Psychological Distress in Australians  
592 Living in Urban Poverty: The Impact of Interpersonal Trauma. *J Trauma Stress, 31*(3), 362-  
593 372. doi:10.1002/jts.22297
- 594 Kingsbury, M., Weeks, M., MacKinnon, N., Evans, J., Mahedy, L., Dykxhoorn, J., & Colman, I. (2016).  
595 Stressful Life Events During Pregnancy and Offspring Depression: Evidence From a  
596 Prospective Cohort Study. *J Am Acad Child Adolesc Psychiatry, 55*(8), 709-716 e702.  
597 doi:10.1016/j.jaac.2016.05.014
- 598 Kwong, A. S. F., Manley, D., Timpson, N. J., Pearson, R. M., Heron, J., Sallis, H., . . . Leckie, G. (2019).  
599 Identifying Critical Points of Trajectories of Depressive Symptoms from Childhood to Young  
600 Adulthood. *J Youth Adolesc, 48*, 815-827. doi:10.1007/s10964-018-0976-5
- 601 Leckie, G., & Charlton, C. (2013). runmlwin: A Program to Run the MLwiN Multilevel Modeling  
602 Software from within Stata. *Journal of Statistical Software, 52*(11).
- 603 Lee, T. K., Wickrama, K. A. S., Kwon, J. A., Lorenz, F. O., & Oshri, A. (2017). Antecedents of transition  
604 patterns of depressive symptom trajectories from adolescence to young adulthood. *Br J Dev*  
605 *Psychol, 35*(4), 498-515. doi:10.1111/bjdp.12189
- 606 Lewis, S. J., Arseneault, L., Caspi, A., Fisher, H. L., Matthews, T., Moffitt, T. E., . . . Danese, A. (2019).  
607 The epidemiology of trauma and post-traumatic stress disorder in a representative cohort of  
608 young people in England and Wales. *The Lancet Psychiatry, 6*(3), 247-256.  
609 doi:10.1016/s2215-0366(19)30031-8
- 610 Little, R. J. A., & Rubin, D. B. (2019). *Statistical analysis with missing data* (3rd Edition ed.). Hoboken,  
611 NJ: John Wiley & Sons.
- 612 Lopéz-Lopez, J. A., Kwong, A. S. F., Pearson, R. M., Tilling, K. M., Fazel, M. S., Washbrook, L., . . .  
613 Hammerton, G. (Forthcoming). Trajectories of depressive symptoms through adolescence  
614 and associations with education and employment: a growth mixture modelling approach.
- 615 Lupien, S. J., McEwen, B. S., Gunnar, M. R., & Heim, C. (2009). Effects of stress throughout the  
616 lifespan on the brain, behaviour and cognition. *Nat Rev Neurosci, 10*(6), 434-445.  
617 doi:10.1038/nrn2639
- 618 Mahedy, L., Hammerton, G., Teyhan, A., Edwards, A. C., Kendler, K. S., Moore, S. C., . . . Heron, J.  
619 (2017). Parental alcohol use and risk of behavioral and emotional problems in offspring. *PLoS*  
620 *One, 12*(6), e0178862. doi:10.1371/journal.pone.0178862
- 621 Mandy, W., Pellicano, L., St Pourcain, B., Skuse, D., & Heron, J. (2018). The development of autistic  
622 social traits across childhood and adolescence in males and females. *J Child Psychol*  
623 *Psychiatry*. doi:10.1111/jcpp.12913
- 624 Marmorstein, N. R. (2009). Longitudinal associations between alcohol problems and depressive  
625 symptoms: early adolescence through early adulthood. *Alcohol Clin Exp Res, 33*(1), 49-59.  
626 doi:10.1111/j.1530-0277.2008.00810.x

- 627 Mazza, J. J., Fleming, C. B., Abbott, R. D., Haggerty, K. P., & Catalano, R. F. (2010). Identifying  
628 trajectories of adolescents' depressive phenomena: an examination of early risk factors. *J*  
629 *Youth Adolesc*, 39(6), 579-593. doi:10.1007/s10964-009-9406-z
- 630 Meadows, S. O., Brown, J. S., & Elder, G. H. (2006). Depressive Symptoms, Stress, and Support:  
631 Gendered Trajectories From Adolescence to Young Adulthood. *Journal of Youth and*  
632 *Adolescence*, 35(1), 89-99. doi:10.1007/s10964-005-9021-6
- 633 Mumford, E. A., Liu, W., Hair, E. C., & Yu, T. C. (2013). Concurrent trajectories of BMI and mental  
634 health patterns in emerging adulthood. *Soc Sci Med*, 98, 1-7.  
635 doi:10.1016/j.socscimed.2013.08.036
- 636 Musliner, K. L., Munk-Olsen, T., Eaton, W. W., & Zandi, P. P. (2016). Heterogeneity in long-term  
637 trajectories of depressive symptoms: Patterns, predictors and outcomes. *J Affect Disord*,  
638 192, 199-211. doi:10.1016/j.jad.2015.12.030
- 639 Muthen, B., & Muthen, L. K. (2000). Integrating Person-Centered and Variable-Centered Analyses:  
640 Growth Mixture Modeling With Latent Trajectory Classes. *ALCOHOLISM: CLINICAL AND*  
641 *EXPERIMENTAL RESEARCH*, 24(6).
- 642 Olino, T. M., Klein, D. N., Lewinsohn, P. M., Rohde, P., & Seeley, J. R. (2010). Latent trajectory classes  
643 of depressive and anxiety disorders from adolescence to adulthood: descriptions of classes  
644 and associations with risk factors. *Compr Psychiatry*, 51(3), 224-235.  
645 doi:10.1016/j.comppsy.2009.07.002
- 646 Owens, S. A., Helms, S. W., Rudolph, K. D., Hastings, P. D., Nock, M. K., & Prinstein, M. J. (2018).  
647 Interpersonal Stress Severity Longitudinally Predicts Adolescent Girls' Depressive Symptoms:  
648 the Moderating Role of Subjective and HPA Axis Stress Responses. *J Abnorm Child Psychol*.  
649 doi:10.1007/s10802-018-0483-x
- 650 Raudenbush, S. W., & Bryk, A. S. (2002). *Hierarchical Linear Models: Applications and Data Analysis*  
651 *Methods* (Second Edition ed.). Thousand Oaks, California: Sage Publications, Inc.
- 652 Rawana, J. S., & Morgan, A. S. (2014). Trajectories of depressive symptoms from adolescence to  
653 young adulthood: the role of self-esteem and body-related predictors. *J Youth Adolesc*,  
654 43(4), 597-611. doi:10.1007/s10964-013-9995-4
- 655 Rice, F., Riglin, L., Thapar, A. K., Heron, J., Anney, R., O'Donovan, M. C., & Thapar, A. (2018).  
656 Characterizing Developmental Trajectories and the Role of Neuropsychiatric Genetic Risk  
657 Variants in Early-Onset Depression. *JAMA Psychiatry*. doi:10.1001/jamapsychiatry.2018.3338
- 658 Sallinen, M., Rönkä, A., Kinnunen, U., & Kokko, K. (2016). Trajectories of depressive mood in  
659 adolescents: Does parental work or parent-adolescent relationship matter? A follow-up  
660 study through junior high school in Finland. *International Journal of Behavioral Development*,  
661 31(2), 181-190. doi:10.1177/0165025407074631
- 662 Sara, G., & Lappin, J. (2017). Childhood trauma: psychiatry's greatest public health challenge? *The*  
663 *Lancet Public Health*, 2(7), e300-e301. doi:10.1016/s2468-2667(17)30104-4
- 664 Schubert, K. O., Clark, S. R., Van, L. K., Collinson, J. L., & Baune, B. T. (2017). Depressive symptom  
665 trajectories in late adolescence and early adulthood: A systematic review. *Aust N Z J*  
666 *Psychiatry*, 51(5), 477-499. doi:10.1177/0004867417700274
- 667 Shore, L., Toumbourou, J. W., Lewis, A. J., & Kremer, P. (2018). Review: Longitudinal trajectories of  
668 child and adolescent depressive symptoms and their predictors - a systematic review and  
669 meta-analysis. *Child and Adolescent Mental Health*, 23(2), 107-120. doi:10.1111/camh.12220
- 670 Singer, J. D., & Willett, J. B. (2003). *Applied Longitudinal Data Analysis: Modelling Change and Event*  
671 *Occurrence*. New York: Oxford University Press.
- 672 Smith, A. D., Hardy, R., Heron, J., Joinson, C. J., Lawlor, D. A., Macdonald-Wallis, C., & Tilling, K.  
673 (2016). A structured approach to hypotheses involving continuous exposures over the life  
674 course. *Int J Epidemiol*, 45(4), 1271-1279. doi:10.1093/ije/dyw164
- 675 Stoolmiller, M., Kim, H. K., & Capaldi, D. M. (2005). The course of depressive symptoms in men from  
676 early adolescence to young adulthood: identifying latent trajectories and early predictors. *J*  
677 *Abnorm Psychol*, 114(3), 331-345. doi:10.1037/0021-843X.114.3.331

- 678 Sutin, A. R., Terracciano, A., Milaneschi, Y., An, Y., Ferrucci, L., & Zonderman, A. B. (2013). The  
679 trajectory of depressive symptoms across the adult life span. *JAMA Psychiatry*, *70*(8), 803-  
680 811. doi:10.1001/jamapsychiatry.2013.193
- 681 Thapar, A., Collinshaw, S., Pine, D. S., & Thapar, A. J. (2012). Depression in adolescence. *Lancet*, *379*,  
682 1056-1067.
- 683 Thapar, A., & McGuffin, P. (1998). Validity of the shortened Mood and Feelings Questionnaire in a  
684 community sample of children and adolescents: a preliminary research note. *Psychiatry*  
685 *Research*, *81*, 259-268.
- 686 Tilling, K., Macdonald-Wallis, C., Lawlor, D. A., Hughes, R. A., & Howe, L. D. (2014). Modelling  
687 childhood growth using fractional polynomials and linear splines. *Ann Nutr Metab*, *65*(2-3),  
688 129-138. doi:10.1159/000362695
- 689 Turner, N., Joinson, C., Peters, T., J., Wiles, N., & Lewis, G. (2014). Validity of the Short Mood and  
690 Feelings Questionnaire in Late Adolescence. *Psychological Assessment*.  
691 doi:10.1037/a0036572.supp
- 692 Weeks, M., Cairney, J., Wild, T. C., Ploubidis, G. B., Naicker, K., & Colman, I. (2014). Early-life  
693 predictors of internalizing symptom trajectories in Canadian children. *Depress Anxiety*, *31*(7),  
694 608-616. doi:10.1002/da.22235
- 695 Whalen, D. J., Luby, J. L., Tilman, R., Mike, A., Barch, D., & Belden, A. C. (2016). Latent class profiles of  
696 depressive symptoms from early to middle childhood: predictors, outcomes, and gender  
697 effects. *J Child Psychol Psychiatry*, *57*(7), 794-804. doi:10.1111/jcpp.12518
- 698 Wiesner, M., & Kim, H. K. (2006). Co-occurring delinquency and depressive symptoms of adolescent  
699 boys and girls: a dual trajectory modeling approach. *Dev Psychol*, *42*(6), 1220-1235.  
700 doi:10.1037/0012-1649.42.6.1220
- 701 Yaroslavsky, I., Pettit, J. W., Lewinsohn, P. M., Seeley, J. R., & Roberts, R. E. (2013). Heterogeneous  
702 trajectories of depressive symptoms: adolescent predictors and adult outcomes. *J Affect*  
703 *Disord*, *148*(2-3), 391-399. doi:10.1016/j.jad.2012.06.028
- 704 Zhang, Z., Parker, R., Charlton, C., Leckie, G., & Browne, W. J. (2016). R2MLwiN - A program to run  
705 the MLwiN multilevel modelling software from within R. *Journal of Statistical Software*,  
706 *72*(10), 1-43. doi:DOI: 10.18637/jss.v072.i10

707

## Tables and figures

Table 1. Participant demographics for the number of traumas

|                                         | No Trauma     | 1 Trauma      | 2 Traumas   | 3+ Traumas  | $\chi^2, p$             |
|-----------------------------------------|---------------|---------------|-------------|-------------|-------------------------|
| <b>Sex</b>                              |               |               |             |             |                         |
| Males n (%)                             | 2,607 (45.70) | 1,166 (54.13) | 355 (49.44) | 141 (47.64) | $x^2 = 45.04, p < .001$ |
| Females n (%)                           | 3,907 (54.30) | 988 (45.87)   | 363 (50.56) | 155 (52.36) |                         |
| <b>Maternal Education</b>               |               |               |             |             |                         |
| A Level or Higher n (%)                 | 2,197 (40.60) | 838 (40.60)   | 293 (42.80) | 125 (43.20) | $x^2 = 3.17, p = 0.79$  |
| O Level n (%)                           | 1,904 (35.20) | 737 (35.70)   | 242 (35.40) | 97 (33.60)  |                         |
| < O Level n (%)                         | 1,311 (24.2)  | 489 (23.70)   | 149 (21.80) | 67 (23.20)  |                         |
| <b>Maternal Socioeconomic Status</b>    |               |               |             |             |                         |
| Professional/Managerial/Technical n (%) | 1,890 (40.80) | 704 (40.30)   | 251 (42.80) | 95 (40.20)  | $x^2 = 1.14, p = 0.77$  |
| Skilled non-manual or lower n (%)       | 2,743 (59.20) | 1,043 (59.70) | 336 (57.20) | 141 (59.80) |                         |
| <b>Parity</b>                           |               |               |             |             |                         |
| First Born n (%)                        | 2,485 (45.20) | 996 (48.20)   | 320 (46.90) | 117 (41.30) | $x^2 = 9.09, p = .169$  |
| Second Born n (%)                       | 1,998 (36.40) | 704 (34.10)   | 233 (34.10) | 106 (37.50) |                         |
| Third Born + n (%)                      | 1,012 (18.40) | 367 (17.70)   | 130 (19.00) | 60 (21.20)  |                         |
| <b>Maternal Postnatal Depression</b>    |               |               |             |             |                         |
| No n (%)                                | 4,849 (92.60) | 1,790 (89.10) | 587 (87.30) | 288 (81.10) | $x^2 = 68.67, p < .001$ |
| Yes n (%)                               | 388 (7.40)    | 219 (10.90)   | 85 (12.70)  | 53 (18.90)  |                         |

Table 2. Adjusted Associations Between Any Trauma (between 5-10 Years) and SMFQ Trajectories (n=6,664)

| Parameter                               | Direct Model Output      |            |                 | Alternative Parametrisation |            |                 |
|-----------------------------------------|--------------------------|------------|-----------------|-----------------------------|------------|-----------------|
|                                         | Estimate (95% CIs)       | Std. Error | <i>p</i> -value | Estimate (95% CIs)          | Std. Error | <i>p</i> -value |
| $\beta_0$ No Trauma Intercept           | 5.17 [4.96, 5.38]        | 0.11       | <.001           | 5.17 [4.96, 5.38]           | 0.11       | <.001           |
| $\beta_1$ No Trauma x Age               | 0.32 [0.28, 0.36]        | 0.02       | <.001           | 0.32 [0.28, 0.36]           | 0.02       | <.001           |
| $\beta_2$ No Trauma x Age <sup>2</sup>  | -0.10 [-0.11, -0.08]     | 0.01       | <.001           | -0.10 [-0.11, -0.08]        | 0.01       | <.001           |
| $\beta_3$ No Trauma x Age <sup>3</sup>  | -0.004 [0.01, -0.003]    | 0.001      | <.001           | -0.004 [0.01, -0.003]       | 0.001      | <.001           |
| $\beta_4$ No Trauma x Age <sup>4</sup>  | 0.002 [0.001, 0.002]     | 0.0001     | <.001           | 0.002 [0.001, 0.002]        | 0.0001     | <.001           |
| $\beta_5$ Yes Trauma Intercept          | 1.23 [0.97, 1.49]        | 0.13       | <.001           | 6.40 [6.15, 6.65]           | 0.13       | <.001           |
| $\beta_6$ Yes Trauma x Age              | 0.06 [-0.01, 0.12]       | 0.03       | 0.09            | 0.38 [0.33, 0.43]           | 0.03       | 0.09            |
| $\beta_7$ Yes Trauma x Age <sup>2</sup> | -0.001 [-0.02, 0.02]     | 0.01       | 0.95            | -0.10 [-0.11, 0.08]         | 0.01       | 0.95            |
| $\beta_8$ Yes Trauma x Age <sup>3</sup> | -0.001 [-0.003, 0.003]   | 0.001      | 0.11            | -0.006 [-0.007, 0.005]      | 0.001      | 0.11            |
| $\beta_9$ Yes Trauma x Age <sup>4</sup> | 0.0001 [-0.0003, 0.0005] | 0.0002     | 0.69            | 0.002 [0.001, 0.002]        | 0.0002     | 0.69            |
| Deviance                                | 189554.21                |            |                 |                             |            |                 |

The no trauma variable should be viewed as the reference category as trauma was coded as a dummy variable (0/1). Thus, the intercept coefficient (and the coefficients for subsequent age terms) for an individual with trauma are the trauma intercept + yes trauma intercept (i.e.,  $\beta_0 + \beta_5$ ). The same applies for all age terms. The Alternative Parametrisation results can therefore be thought of as the calculated scores and therefore the  $\beta_x$  refer to the direct model output only. The standard error and *p*-value correspond to the differences between the trauma estimates and the no trauma differences. The adjusted analysis included confounders (all entered as main effects) child sex, maternal postnatal depression, maternal education and social economic status at birth and parity. Intercepts are centred to age 16, the mean age of all assessments

Table 3. Adjusted Associations Between Number of Traumas (5-10 Years) and SMFQ Trajectories (n=6,711)

| Parameter                                  | Direct Model Output      |            |         | Alternative Parametrisation |            |         |
|--------------------------------------------|--------------------------|------------|---------|-----------------------------|------------|---------|
|                                            | Estimate (95% CIs)       | Std. Error | p-value | Estimate (95% CIs)          | Std. Error | p-value |
| $\beta_0$ No Traumas Intercept             | 5.18 [4.97, 5.39]        | 0.11       | <.001   | 5.18 [4.97, 5.39]           | 0.11       | <.001   |
| $\beta_1$ No Traumas x Age                 | 0.32 [0.28, 0.36]        | 0.02       | <.001   | 0.32 [0.28, 0.36]           | 0.02       | <.001   |
| $\beta_2$ No Traumas x Age <sup>2</sup>    | -0.10 [-0.11, -0.08]     | 0.01       | <.001   | -0.10 [-0.11, -0.08]        | 0.01       | <.001   |
| $\beta_3$ No Traumas x Age <sup>3</sup>    | -0.004 [-0.01, -0.003]   | 0.001      | <.001   | -0.004 [-0.01, -0.003]      | 0.001      | <.001   |
| $\beta_4$ No Traumas x Age <sup>4</sup>    | 0.002 [0.001, 0.002]     | 0.0001     | <.001   | 0.002 [0.001, 0.002]        | 0.0001     | <.001   |
| $\beta_5$ 1 Trauma Intercept               | 0.72 [0.43, 1.02]        | 0.15       | <.001   | 5.90 [5.61, 6.18]           | 0.15       | <.001   |
| $\beta_6$ 1 Trauma x Age                   | 0.02 [-0.06, 0.09]       | 0.04       | 0.64    | 0.34 [0.28, 0.4]            | 0.04       | 0.64    |
| $\beta_7$ 1 Trauma x Age <sup>2</sup>      | 0.02 [-0.01, 0.04]       | 0.01       | 0.13    | -0.08 [-0.1, -0.06]         | 0.01       | 0.13    |
| $\beta_8$ 1 Trauma x Age <sup>3</sup>      | -0.001 [-0.003, 0.001]   | 0.001      | 0.50    | -0.005 [-0.007, -0.004]     | 0.001      | 0.50    |
| $\beta_9$ 1 Trauma x Age <sup>4</sup>      | -0.0003 [-0.001, 0.0002] | 0.0002     | 0.22    | 0.001 [0.001, 0.002]        | 0.0002     | 0.22    |
| $\beta_{10}$ 2 Traumas Intercept           | 1.70 [1.24, 2.15]        | 0.23       | <.001   | 6.87 [6.43, 7.32]           | 0.23       | <.001   |
| $\beta_{11}$ 2 Traumas x Age               | 0.11 [-0.0001, 0.23]     | 0.06       | 0.05    | 0.43 [0.33, 0.54]           | 0.06       | 0.05    |
| $\beta_{12}$ 2 Traumas x Age <sup>2</sup>  | -0.01 [-0.04, 0.03]      | 0.02       | 0.60    | -0.10 [-0.14, -0.07]        | 0.02       | 0.6     |
| $\beta_{13}$ 2 Traumas x Age <sup>3</sup>  | -0.002 [-0.01, 0.001]    | 0.002      | 0.13    | -0.007 [-0.01, -0.004]      | 0.002      | 0.13    |
| $\beta_{14}$ 2 Traumas x Age <sup>4</sup>  | 0.0004 [-0.0003, 0.001]  | 0.0004     | 0.28    | 0.002 [0.001, 0.003]        | 0.0004     | 0.28    |
| $\beta_{15}$ 3+ Traumas Intercept          | 3.63 [2.94, 4.32]        | 0.35       | <.001   | 8.81 [8.12, 9.49]           | 0.35       | <.001   |
| $\beta_{16}$ 3+ Traumas x Age              | 0.19 [0.02, 0.36]        | 0.09       | 0.03    | 0.51 [0.34, 0.67]           | 0.09       | 0.03    |
| $\beta_{17}$ 3+ Traumas x Age <sup>2</sup> | -0.11 [-0.16, -0.06]     | 0.03       | <.001   | -0.20 [-0.26, -0.15]        | 0.03       | <.001   |
| $\beta_{18}$ 3+ Traumas x Age <sup>3</sup> | -0.005 [-0.01, -0.0001]  | 0.002      | 0.05    | -0.009 [-0.01, -0.005]      | 0.002      | 0.05    |
| $\beta_{19}$ 3+ Traumas x Age <sup>4</sup> | 0.002 [0.001, 0.003]     | 0.001      | <.001   | 0.004 [0.003, 0.005]        | 0.001      | <.001   |
| Deviance                                   | 189944.36                |            |         |                             |            |         |

The no traumas variable should be viewed as the reference category as the number of traumas were coded as dummy variable (0/1/2/3). Thus, the intercept coefficient (and the coefficients for the subsequent age terms) for an individual with 3+ traumas is the no trauma intercept + 3+ traumas intercept (i.e.,  $\beta_0 + \beta_{15}$ ). The same applies for all age terms. The Alternative Parametrisation results can therefore be thought of as the completed results. The standard error and p-value correspond to the differences between the trauma estimates and the no trauma differences. The adjusted analysis included confounders (all entered as main effects) child sex, maternal postnatal depression, maternal education and social economic status at birth and parity. Intercepts are centred to age 16, the mean age of all assessments

Table 4. Comparisons Between Different Trauma Trajectories and Depressive Symptoms Scores at Various Ages

|                                     | Age 12                 | Age 14                | Age 16                | Age 18                | Age 20                | Age 22                 | Age 24                 |
|-------------------------------------|------------------------|-----------------------|-----------------------|-----------------------|-----------------------|------------------------|------------------------|
| <b>No Trauma VS Any Traumas</b>     |                        |                       |                       |                       |                       |                        |                        |
| Predicted No Trauma DS Score        | 2.90 (0.09)            | 3.89 (0.09)           | 5.17 (0.11)           | 5.43 (0.11)           | 5.20 (0.12)           | 4.88 (0.13)            | 5.73 (0.14)            |
| Predicted Any Traumas DS Score      | 4.03 (0.10)            | 5.00 (0.11)           | 6.40 (0.13)           | 6.73 (0.13)           | 6.57 (0.14)           | 6.24 (0.15)            | 7.03 (0.17)            |
| Difference, <i>P</i> -Value         | 1.12 (0.10),<br><.001  | 1.11 (0.10),<br><.001 | 1.23 (0.13),<br><.001 | 1.30 (0.14),<br><.001 | 1.37 (0.16),<br><.001 | 1.36 (0.17),<br><.001  | 1.30 (0.20),<br><.001  |
| SMFQ % Difference                   | 4.31                   | 4.27                  | 4.73                  | 5.00                  | 5.27                  | 5.23                   | 5.00                   |
| <b>No Traumas VS 1/2/3+ Traumas</b> |                        |                       |                       |                       |                       |                        |                        |
| Predicted No Trauma DS Score        | 2.91 (0.09)            | 3.90 (0.09)           | 5.18 (0.11)           | 5.43 (0.11)           | 5.20 (0.12)           | 4.88 (0.13)            | 5.74 (0.14)            |
| Predicted 1 Trauma DS Score         | 3.86 (0.11)            | 4.69 (0.12)           | 5.90 (0.13)           | 6.22 (0.15)           | 6.13 (0.17)           | 5.88 (0.18)            | 6.43 (0.21)            |
| Difference, <i>P</i> -Value         | 0.95 (0.11),<br><.001  | 0.79 (0.12),<br><.001 | 0.72 (0.15),<br><.001 | 0.78 (0.16),<br><.001 | 0.93 (0.18),<br><.001 | 0.99 (0.20),<br><.001  | 0.70 (0.23),<br>=.003* |
| SMFQ % Difference                   | 3.65                   | 3.04                  | 2.77                  | 3.00                  | 3.58                  | 3.81                   | 2.69                   |
| Predicted 2 Traumas DS Score        | 4.27 (0.17)            | 5.30 (0.18)           | 6.87 (0.23)           | 7.27 (0.24)           | 7.14 (0.26)           | 6.89 (0.33)            | 7.99 (0.21)            |
| Difference, <i>P</i> -Value         | 1.37 (0.17),<br><.001  | 1.40 (0.18),<br><.001 | 1.70 (0.23),<br><.001 | 1.84 (0.25),<br><.001 | 1.94 (0.27),<br><.001 | 2.00 (0.29),<br><.001  | 2.25 (0.35),<br><.001  |
| SMFQ % Difference                   | 5.27                   | 5.38                  | 6.54                  | 7.08                  | 7.46                  | 7.69                   | 8.65                   |
| Predicted 3+Traumas DS Score        | 4.67 (0.26)            | 6.50 (0.28)           | 8.81 (0.35)           | 9.10 (0.37)           | 8.26 (0.40)           | 7.24 (0.42)            | 8.71 (0.49)            |
| Difference, <i>P</i> -Value         | 1.77 (0.26),<br><.001  | 2.61 (0.28),<br><.001 | 3.63 (0.35),<br><.001 | 3.67 (0.38),<br><.001 | 3.06 (0.27),<br><.001 | 2.36 (0.43),<br><.001  | 2.97 (0.50),<br><.001  |
| SMFQ % Difference                   | 6.81                   | 10.04                 | 13.96                 | 14.12                 | 11.77                 | 9.08                   | 11.42                  |
| <b>1 Trauma VS 2/3+ Traumas</b>     |                        |                       |                       |                       |                       |                        |                        |
| Predicted 1 Trauma DS Score         | 3.86 (0.11)            | 4.69 (0.12)           | 5.90 (0.13)           | 6.22 (0.15)           | 6.13 (0.17)           | 5.88 (0.18)            | 6.43 (0.21)            |
| Predicted 2 Traumas DS Score        | 4.27 (0.17)            | 5.30 (0.18)           | 6.87 (0.23)           | 7.27 (0.24)           | 7.14 (0.26)           | 6.89 (0.33)            | 7.99 (0.21)            |
| Difference, <i>P</i> -Value         | 0.41 (0.18),<br>=.025* | 0.61 (0.2),<br>=.002* | 0.97 (0.25),<br><.001 | 1.05 (0.27),<br><.001 | 1.01 (0.29),<br>=.001 | 1.01 (0.32),<br>=.002* | 1.56 (0.38),<br><.001  |
| SMFQ % Difference                   | 1.58                   | 2.35                  | 3.73                  | 4.04                  | 3.88                  | 3.88                   | 6.00                   |
| Predicted 3+Traumas DS Score        | 4.67 (0.26)            | 6.50 (0.28)           | 8.81 (0.35)           | 9.10 (0.37)           | 8.26 (0.4)            | 7.24 (0.42)            | 8.71 (0.49)            |



|                               |                        |                       |                       |                       |                        |                        |                        |
|-------------------------------|------------------------|-----------------------|-----------------------|-----------------------|------------------------|------------------------|------------------------|
| Difference, <i>P</i> -Value   | 0.82 (0.27),<br>=.002* | 1.82 (0.29),<br><.001 | 2.91 (0.37),<br><.001 | 2.89 (0.39),<br><.001 | 2.13 (0.42),<br><.001  | 1.36 (0.45),<br>=.002* | 2.28 (0.53),<br><.001  |
| SMFQ % Difference             | 3.15                   | 7.00                  | 11.19                 | 11.12                 | 8.19                   | 5.23                   | 8.77                   |
| <b>2 Trauma VS 3+ Traumas</b> |                        |                       |                       |                       |                        |                        |                        |
| Predicted 2 Traumas DS Score  | 4.27 (0.17)            | 5.30 (0.18)           | 6.87 (0.23)           | 7.27 (0.24)           | 7.14 (0.26)            | 6.89 (0.33)            | 7.99 (0.21)            |
| Predicted 3+ Traumas DS Score | 4.67 (0.26)            | 6.50 (0.28)           | 8.81 (0.35)           | 9.10 (0.37)           | 8.26 (0.4)             | 7.24 (0.42)            | 8.71 (0.49)            |
| Difference, <i>P</i> -Value   | 0.40 (0.3),<br>=.176*  | 1.21 (0.32),<br><.001 | 1.94 (0.41),<br><.001 | 1.83 (0.43),<br><.001 | 1.12 (0.47),<br>=.016* | 0.35 (0.5),<br>=.478*  | 0.72 (0.59),<br>=.221* |
| SMFQ % Difference             | 1.54                   | 4.65                  | 7.46                  | 7.04                  | 4.31                   | 1.35                   | 2.77                   |

DS: Depressive symptoms. SMFQ: Short mood and feelings questionnaire. Predicted mean depressive symptom scores calculated at various ages for each trajectory (standard errors are given in parenthesis). All analysis was Bonferroni corrected (an alpha level of 0.05 divided by the number of statistical comparisons (49) is therefore  $0.05/49=0.001$ ) to allow for multiple hypothesis testing. \* denotes results were not significant at the Bonferroni adjusted level.

Figure 1. Adjusted Association Between Any Trauma (between 5-10 Years) and SMFQ Trajectories

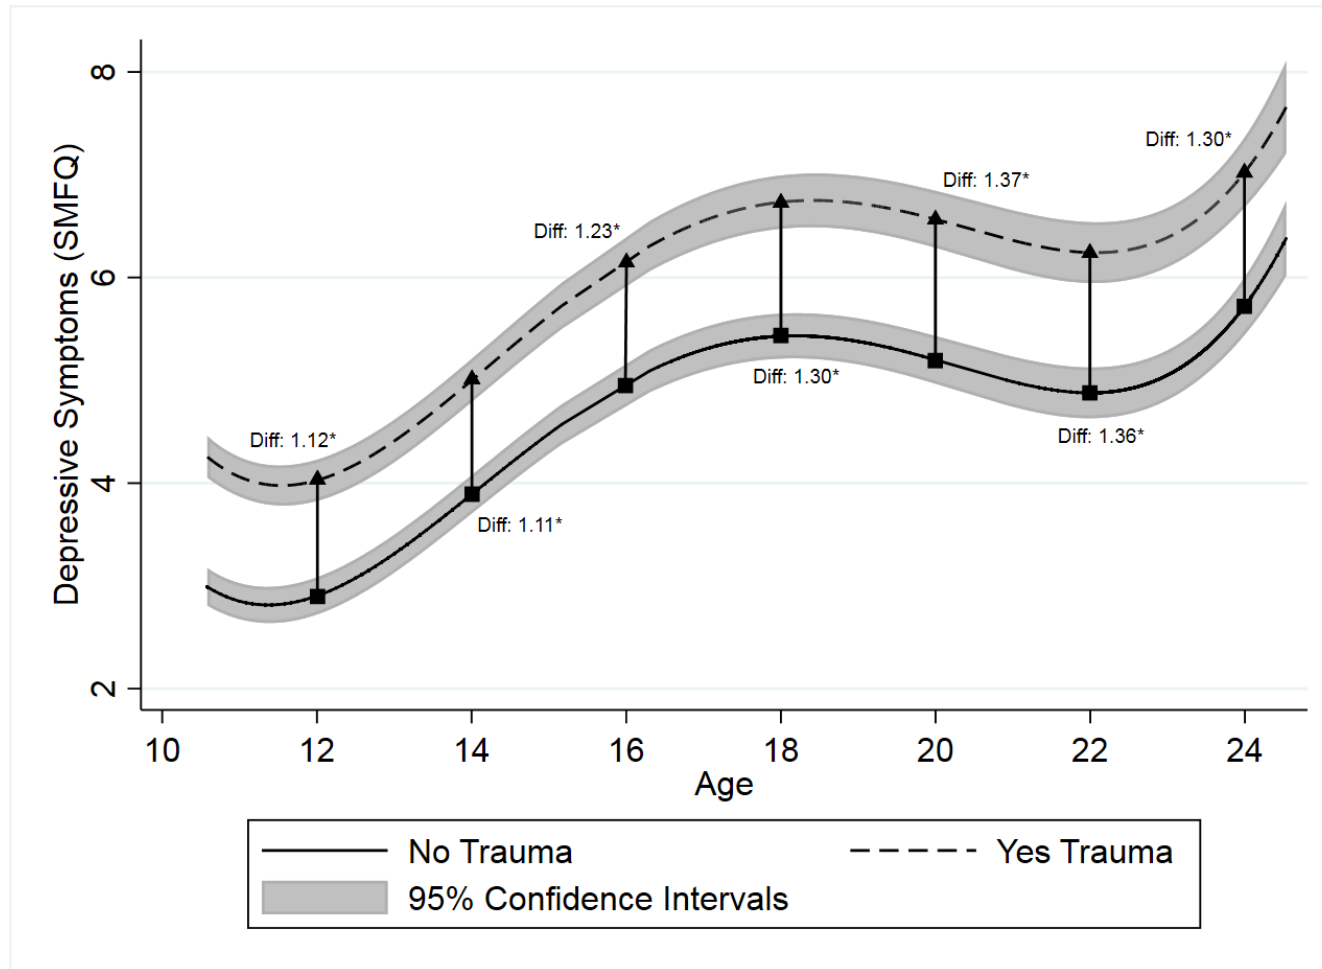

Averaged population trajectories of depressive symptoms for no trauma compared to yes trauma. Mean SMFQ differences at ages 12, 14, 16, 18, 20, 22 and 24 are calculated between trajectories. ■ indicates age comparison for no trauma. ▲ indicates age comparison for yes trauma. \* indicates  $P < .001$ .

Figure 2. Adjusted Association Between Number of Trauma Types (between 5-10 Years) and SMFQ Trajectories

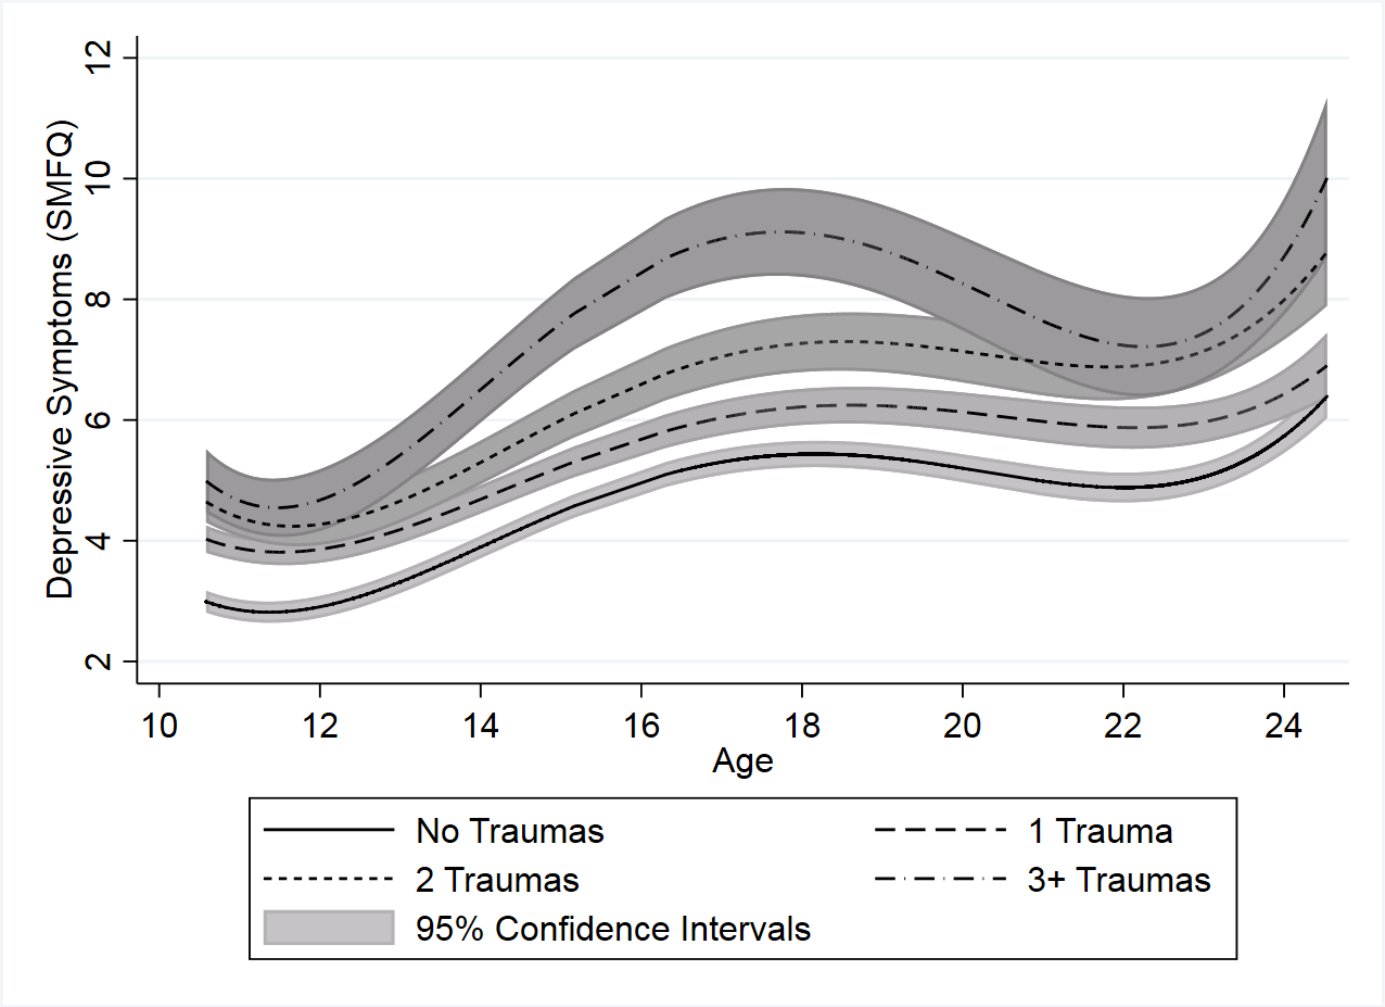

## **Acknowledgements**

We are extremely grateful to all the families who took part in this study, the midwives for their help in recruiting them, and the whole ALSPAC team, which includes interviewers, computer and laboratory technicians, clerical workers, research scientists, volunteers, managers, receptionists and nurses. The UK Medical Research Council and Wellcome (Grant Ref: 102215/2/13/2) and the University of Bristol provide core support for ALSPAC. A comprehensive list of grant funding is available on the ALSPAC website. This research was specifically funded by Wellcome (08426812/Z/07/Z), Wellcome and the MRC (076467/Z/05/Z; 092731; 092731; 092731), the MRC (MR/M006727/1), NIH (PD301198-SC101645). A.S.F.K is funded by an ESRC Advanced Quantitative Methods Studentship.

## **Author Contributions**

A.S.F.K had full access to all the data in the study and takes responsibility for the integrity of the data and the accuracy of the data analysis.

Study concept and design: A.S.F.K.

Acquisition, analysis, or interpretation of data: All authors.

Drafting of the manuscript: A.S.F.K.

Critical revision of the manuscript for important intellectual content: All authors.

Statistical analysis: A.S.F.K, J.M.M, G.L.

Administrative, technical, or material support: A.S.F.K.

Study supervision: G.L.
